# Supplementary material for: A novel coating with universal adhesion and inflammation-responsive drug release functions to manipulate the osteoimmunomodulation of implants
Source: Royal Society of Chemistry journal article supplement (doi:10.1039/d1tb00953b), 2021-01-01
Supplement: d1tb00953b1.pdf [file d1tb00953b1.pdf]

**A novel Coating with universal adhesion and inflammation-  
responsive drug release functions to manipulate  
osteimmunomodulation of implants**

#Min He<sup>a, b, c</sup>, #Bo Yang<sup>a, b, c</sup>, Fangjun Huo, Li Xie<sup>a, b, c</sup>, Mo Yang<sup>d\*</sup> and Weidong Tian<sup>a, b, c\*</sup>

<sup>a</sup> State Key Laboratory of Oral Diseases, Engineering Research Center of Oral Translational Medicine, Ministry of Education, West China Hospital of Stomatology, Sichuan University, Chengdu, Sichuan 610041, China

<sup>b</sup> National Engineering Laboratory for Oral Regenerative Medicine, West China Hospital of Stomatology, Sichuan University, Chengdu, Sichuan 610041, China

<sup>c</sup> Department of Oral and Maxillofacial Surgery, West China Hospital of Stomatology, Sichuan University, Chengdu, Sichuan 610041, China

<sup>d</sup> Department of Biomedical Engineering, The Hong Kong Polytechnic University, Hung Hom, Kowloon, Hong Kong, P. R. China

\* Corresponding author. Tel: +86-028-85502122, Fax: 028-85503499; E-mail: [drtwd@sina.com](mailto:drtwd@sina.com); [mo.yang@polyu.edu.hk](mailto:mo.yang@polyu.edu.hk)

### **1.1 *In vitro* Biocompatibility Evaluation**

Raw264.7 macrophage cells and rBMSCs were used to evaluate the *in vitro* biocompatibility of the coating.  $1 \times 10^4$  cells were seeded on each samples. After culturing for 1, 3, and 5 days, the cells were rinsed with PBS buffer and incubated in 10% CCK-8 containing medium for another 4 h at 37 °C, and then the absorbance at 450 nm was acquired by a spectrophotometer. For cell morphology observation, the cells were dehydrated by graded ethanol and then dried in hexamethyldisilane. Finally, the cell morphology was observed by SEM after sputtered with gold.

### **1.2 Gene Expression of Macrophage on the Coatings.**

**Gene expression of macrophages on the coatings.**  $1.5 \times 10^5$  cells were seeded onto the coatings. After culturing for 4 days, the cell seeded samples were washed twice with PBS and total RNA from the cells were extracted using TRIzol reagent (Life Technologies), and were used to synthesize complementary DNA using the DyNAmo™ cDNA Kit following the manufacturer's instructions. RT-PCR assay was applied to detect the expression of inflammatory genes (IL-1  $\beta$ , IL-6, TNF- $\alpha$ , IL-4, IL-10), macrophage phenotype markers (CD86 for M1, CD-206 and CD163 for M2), osteogenic-related genes (BMP-2, TGF- $\beta$  1, VEGF), and osteoclastic-related genes (TRAP and STSK). RAW264.7 cells cultured in the 6-well plate were used as control.

**Cytokines expressions of macrophages on the coatings.**  $1.5 \times 10^5$  cells were seeded onto the coatings. After 12 h culturing, the normal medium was replaced by medium with 1  $\mu\text{g}/\text{mL}$  lipopolysaccharide (LPS) to activate inflammatory macrophages. After 2 h stimulation, the medium was replaced by serum-free culture medium for another 6 h culturing. Then, the supernatant was collected and centrifuged, and ELISA kits were used to examine the concentrations of IL-1 $\beta$ , IL-4, IL-6, IL-10, and TNF- $\alpha$ .

### **1.3 OIM property evaluation of the coatings**

To further confirm its osteogenic differentiation potential, alizarin Red staining was used to highlight mineralization nodules in BMSCs grown in a 96-well plate for 14 days in conditioned medium with osteogenic components. The cells were washed with distilled water and fixed in 4% paraformaldehyde for 10 min. After rinsing with distilled water, the cells were stained in a solution of 2% Alizarin Red S at pH 4.1 for 20 min. The samples were air-dried, and images acquired with a light microscope.

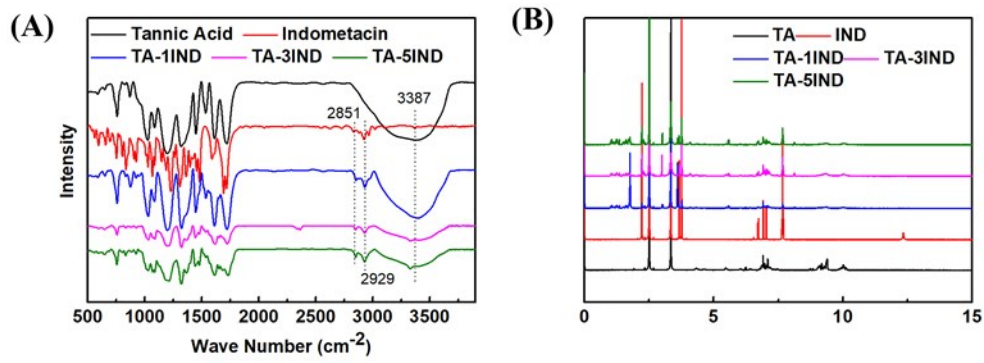

**Figure S1.** (A) FTIR spectrum of the synthesized TA-IND molecules; (B) <sup>13</sup>C NMR spectrum of the synthesized TA-IND molecules.

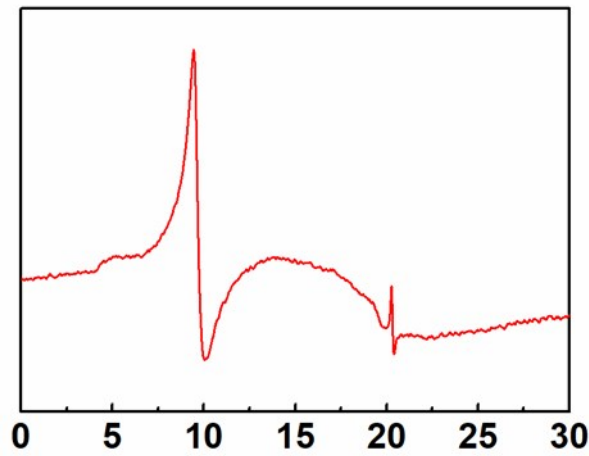

**Figure S2.** EPR spectra of the TA-IND/Fe<sup>3+</sup> powder.

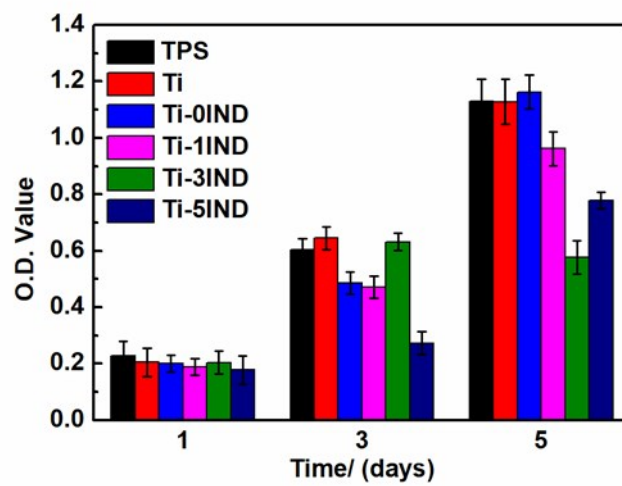

**Figure S3.** Proliferation profiles of HUVECs on the coatings.

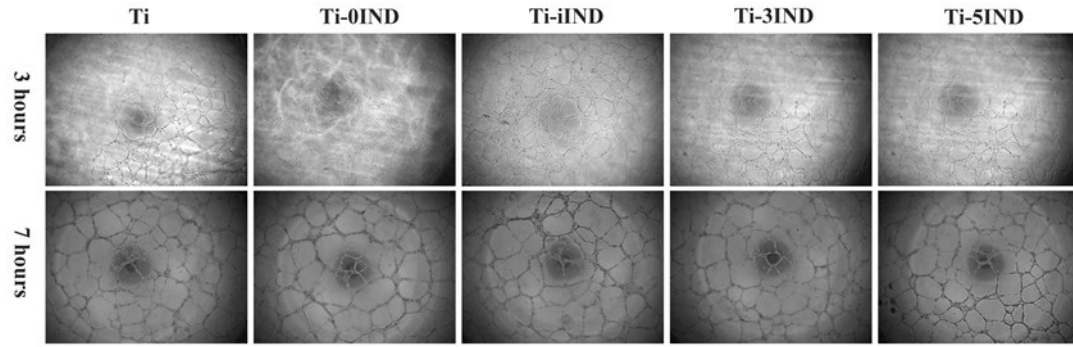

**Figure S4.** In vitro time-lapse microscopy images of the capillary network formed by HUVECs on ECMatrix gel with the specimen-conditioned medium.

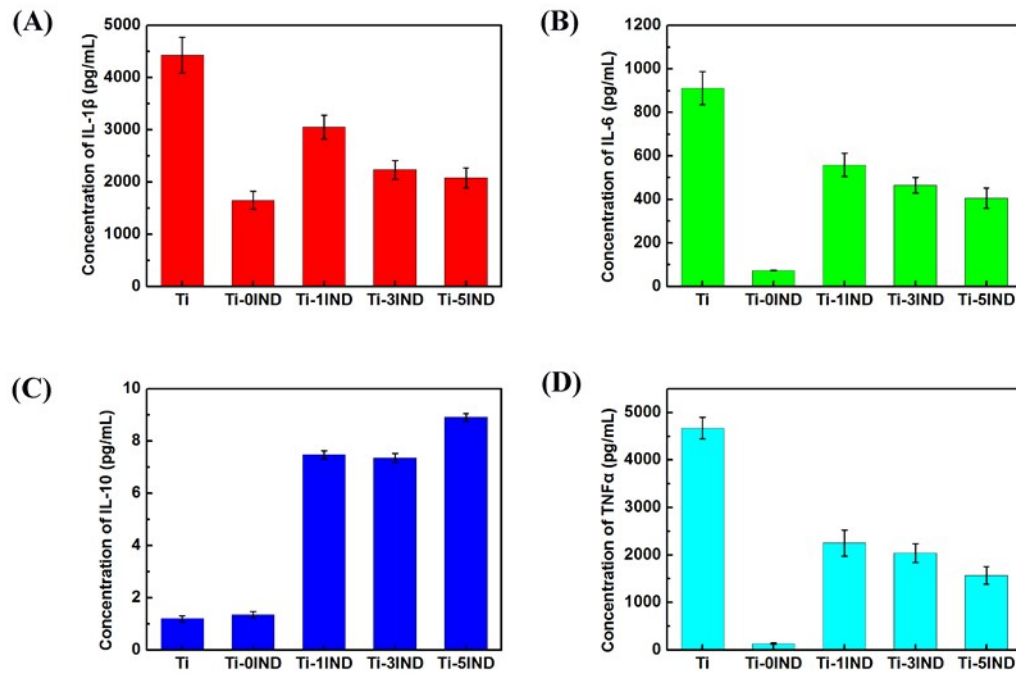

**Figure S5.** The concentrations of inflammatory-related cytokines secreted by the LPS treated macrophages seeded on the coatings.

**Table S1. RNA Primers applied in this study**

| GENE         | Forward primer (5'–3')      | Reverse primer (5'–3')  |
|--------------|-----------------------------|-------------------------|
| <b>GAPDH</b> | TGACCACAGTCCATGCCATC        | GACGGACACATTGGGGGTAG    |
| <b>IL-1β</b> | TGGAGAGTGTGGATCCCAAG        | GGTGCTGATGTACCAGTTGG    |
| <b>IL-6</b>  | ATAGTCCTTCTACCCCAATTTC<br>C | GATGAATTGGATGGTCTTGGTCC |

---

|                                |                             |                              |
|--------------------------------|-----------------------------|------------------------------|
| <b>IL-10</b>                   | GAGAAGCATGGCCAGAAATC        | GAGAAATCGATGACAGCGCC         |
| <b>TNF-<math>\alpha</math></b> | CTGAACTTCGGGGTGATCGG        | GGCTTGTCACCTCGAATTTTGAGA     |
| <b>INOS</b>                    | CACCAAGCTGAACTTGAGCG        | CGTGGCTTTGGGCTCCTC           |
| <b>CD206</b>                   | AGACGAAATCCCTGCTACTG        | CACCCATTCTGAAGGCATTC         |
| <b>CD163</b>                   | CGTGTGCAGTGTCAAAAGG         | CACAAACCAAGAGTGCCGTG         |
| <b>CD86</b>                    | CTGCTCATCATTGTATGTCAC       | ACTGCCTTCACTCTGCATTTG        |
| <b>BMP2</b>                    | GCTCCACAAACGAGAAAAGC        | AGCAAGGGGAAAAGGACACT         |
| <b>TGF-<math>\beta</math>1</b> | CAGTACAGCAAGGTCCTTGC        | ACGTAGTAGACGATGGGCAG         |
| <b>VEGF</b>                    | GTCCCATGAAGTGATCAAGTTC      | TCTGCATGGTGATGTTGCTCTCT<br>G |
| <b>ALP</b>                     | AGGGTGGGTAGTCATTTGCATA<br>G | GAGGCATACGCCATCACATG         |
| <b>OCN</b>                     | CCGGGAGCAGTGTGAGCTTA        | AGGCGGTCTTCAAGCCATACT        |
| <b>OST</b>                     | CCCTTCTCAAGCACCAATGG        | AGGGTGGGTAGTCATTTGCATAG      |
| <b>COL-1</b>                   | CTCCGGCTCCTGCTCCTCTTA       | ACCAGGAAGTCCAGGCTGTC         |

---
